# Supplementary material for: The PainSMART project: Protocol for a research program on effectiveness, mechanisms of effect and patient-practitioner experiences of the PainSMART-strategy as an adjunct to usual primary care physiotherapy management for musculoskeletal pain
Source: PubMed Central journal article supplement (PMC11781673; doi:10.1371/journal.pone.0316806), 2025-01-30
Supplement: pone.0316806.s002.pdf [file pone.0316806.s002.pdf]

| <b>Data category</b>                          | <b>Information</b>                                                                                                                                                                                                                                                                                                                                                                                                                                                                                                                                                                                                                                                                                                                                                                                                                                                                                                                                                                                                                                                                                                                                               |
|-----------------------------------------------|------------------------------------------------------------------------------------------------------------------------------------------------------------------------------------------------------------------------------------------------------------------------------------------------------------------------------------------------------------------------------------------------------------------------------------------------------------------------------------------------------------------------------------------------------------------------------------------------------------------------------------------------------------------------------------------------------------------------------------------------------------------------------------------------------------------------------------------------------------------------------------------------------------------------------------------------------------------------------------------------------------------------------------------------------------------------------------------------------------------------------------------------------------------|
| Primary registry and trial identifying number | ClinicalTrials.gov<br>NCT06187428                                                                                                                                                                                                                                                                                                                                                                                                                                                                                                                                                                                                                                                                                                                                                                                                                                                                                                                                                                                                                                                                                                                                |
| Date of registration in primary registry      | 15/12/2023                                                                                                                                                                                                                                                                                                                                                                                                                                                                                                                                                                                                                                                                                                                                                                                                                                                                                                                                                                                                                                                                                                                                                       |
| Prospective Registration:                     | Yes                                                                                                                                                                                                                                                                                                                                                                                                                                                                                                                                                                                                                                                                                                                                                                                                                                                                                                                                                                                                                                                                                                                                                              |
| Secondary identifying numbers                 | N/A                                                                                                                                                                                                                                                                                                                                                                                                                                                                                                                                                                                                                                                                                                                                                                                                                                                                                                                                                                                                                                                                                                                                                              |
| Source(s) of monetary or material support     | Linköping University, The Research Council of Southeast Sweden (FORSS), Östergötland healthcare region                                                                                                                                                                                                                                                                                                                                                                                                                                                                                                                                                                                                                                                                                                                                                                                                                                                                                                                                                                                                                                                           |
| Primary sponsor                               | Linköping University                                                                                                                                                                                                                                                                                                                                                                                                                                                                                                                                                                                                                                                                                                                                                                                                                                                                                                                                                                                                                                                                                                                                             |
| Secondary sponsor(s)                          | The Research Council of Southeast Sweden (FORSS), Östergötland healthcare region                                                                                                                                                                                                                                                                                                                                                                                                                                                                                                                                                                                                                                                                                                                                                                                                                                                                                                                                                                                                                                                                                 |
| Contact for public queries                    | Richard M Thompson, MSc, [+46793345083] [richard.thompson@regionostergotland.se]                                                                                                                                                                                                                                                                                                                                                                                                                                                                                                                                                                                                                                                                                                                                                                                                                                                                                                                                                                                                                                                                                 |
| Contact for scientific queries                | Kajsa Johansson, MSc, PhD<br>Linköping University, Linköping, Sweden                                                                                                                                                                                                                                                                                                                                                                                                                                                                                                                                                                                                                                                                                                                                                                                                                                                                                                                                                                                                                                                                                             |
| Public title                                  | The PainSMART Research Program: Evaluating a Pain Education Strategy for Patients Seeking Primary Care Physiotherapy PainSMART                                                                                                                                                                                                                                                                                                                                                                                                                                                                                                                                                                                                                                                                                                                                                                                                                                                                                                                                                                                                                                   |
| Scientific title                              | The PainSMART Project: A Research Program on Effectiveness, Mechanisms of Effect and Patient-practitioner Experiences of the PainSMART-strategy as an Adjunct to Usual Primary Care Physiotherapy Management for Musculoskeletal Pain                                                                                                                                                                                                                                                                                                                                                                                                                                                                                                                                                                                                                                                                                                                                                                                                                                                                                                                            |
| Countries of recruitment                      | Sweden                                                                                                                                                                                                                                                                                                                                                                                                                                                                                                                                                                                                                                                                                                                                                                                                                                                                                                                                                                                                                                                                                                                                                           |
| Health condition(s) or problem(s) studied     | Pain, Musculoskeletal, Pain Acute, Pain Chronic, Patient-Centered Care, Communication, Referral and Consultation, Self Efficacy, Illness Perceptions, Anxiety, Worry, Physical Activity Level, Sickness Absence.                                                                                                                                                                                                                                                                                                                                                                                                                                                                                                                                                                                                                                                                                                                                                                                                                                                                                                                                                 |
| Intervention(s)                               | Other: PainSMART-strategy<br>Other: Usual physiotherapy management                                                                                                                                                                                                                                                                                                                                                                                                                                                                                                                                                                                                                                                                                                                                                                                                                                                                                                                                                                                                                                                                                               |
| Key inclusion and exclusion criteria          | Inclusion Criteria:<br>- Patients (Both men and women) who, via telephone or online text-based triage, are judged to have benign Musculoskeletal pain (MSKP) and are booked for an initial physiotherapy consultation at one of the five participating physiotherapy departments<br>- Adult patients (18 years or older)<br><br>Exclusion Criteria:<br>- Patients who are judged to require urgent medical examination due to suspected serious pathology (red flags)<br>- Patients who are booked to an initial physiotherapy consultation on the same day as, or the day directly following triage.<br>- Patients referred for physiotherapy following consultation with a tertiary care practitioner (e.g. orthopaedic surgeon, rheumatologist, neurologist)<br>- Patients who cannot communicate in Swedish to the equivalent of a 12-year-old native speaker (as judged by the triaging physiotherapist)<br>- Patients who, through visual impairments, are unable to complete the necessary questionnaires for the study<br>- Patients who are booked for an initial consultation with a physiotherapist who has not consented to taking part in the study |
| Study type                                    | Interventional                                                                                                                                                                                                                                                                                                                                                                                                                                                                                                                                                                                                                                                                                                                                                                                                                                                                                                                                                                                                                                                                                                                                                   |
| Date of first enrolment                       | January 22, 2024                                                                                                                                                                                                                                                                                                                                                                                                                                                                                                                                                                                                                                                                                                                                                                                                                                                                                                                                                                                                                                                                                                                                                 |
| Target sample size                            | 490                                                                                                                                                                                                                                                                                                                                                                                                                                                                                                                                                                                                                                                                                                                                                                                                                                                                                                                                                                                                                                                                                                                                                              |
| Recruitment status                            | Recruiting                                                                                                                                                                                                                                                                                                                                                                                                                                                                                                                                                                                                                                                                                                                                                                                                                                                                                                                                                                                                                                                                                                                                                       |
| Primary outcome(s)                            | Mean change from baseline and proportion of responders in self-reported Pain Self-efficacy measured using the Pain Self-efficacy questionnaire 10 (PSEQ-10) (within- and between group changes) [Time Frame: The PSEQ-10 will be collected at baseline, 24-72 hours prior to the initial physiotherapy consultation, 24 hours post-initial physiotherapy consultation and again at three months post-baseline]<br>Mean change from baseline and proportion of responders in self-reported Pain Intensity measured using numerical rating scale (NRS) (within- and between group changes) [Time Frame: NRS will be collected at baseline, 24-72 hours prior to the initial physiotherapy consultation, 24 hours post-initial physiotherapy consultation and again at three months post-baseline]                                                                                                                                                                                                                                                                                                                                                                  |
| Key secondary outcomes                        | Secondary Outcome(s)<br>Direct healthcare costs per patient [Time Frame: Total aggregated direct healthcare costs (for all participants in each group) between baseline and three months post-                                                                                                                                                                                                                                                                                                                                                                                                                                                                                                                                                                                                                                                                                                                                                                                                                                                                                                                                                                   |

|  |                                                                                                                                                                                                                                                                                                                                                                                                                                                                                                                                                                                                                                                                                                                                                                                                                                                                                                                                                                                                                                                                                                                                                                                                                                                                                                                                                                                                                                                                                                                                                                                                                                                                                                                                                                                                                                                                                                                                                                                                                                                                                                                                                                                                                                                                                                                                                                                                                                                                                                                                                                                                                                                                                                                                                                                                                                                                                                                                                                                                                                                                                                                                                                                                                                                                                                                                                                                                                                                                                                                                                                                                                                                                                                                                                                                                                                                                                                                                                                          |
|--|--------------------------------------------------------------------------------------------------------------------------------------------------------------------------------------------------------------------------------------------------------------------------------------------------------------------------------------------------------------------------------------------------------------------------------------------------------------------------------------------------------------------------------------------------------------------------------------------------------------------------------------------------------------------------------------------------------------------------------------------------------------------------------------------------------------------------------------------------------------------------------------------------------------------------------------------------------------------------------------------------------------------------------------------------------------------------------------------------------------------------------------------------------------------------------------------------------------------------------------------------------------------------------------------------------------------------------------------------------------------------------------------------------------------------------------------------------------------------------------------------------------------------------------------------------------------------------------------------------------------------------------------------------------------------------------------------------------------------------------------------------------------------------------------------------------------------------------------------------------------------------------------------------------------------------------------------------------------------------------------------------------------------------------------------------------------------------------------------------------------------------------------------------------------------------------------------------------------------------------------------------------------------------------------------------------------------------------------------------------------------------------------------------------------------------------------------------------------------------------------------------------------------------------------------------------------------------------------------------------------------------------------------------------------------------------------------------------------------------------------------------------------------------------------------------------------------------------------------------------------------------------------------------------------------------------------------------------------------------------------------------------------------------------------------------------------------------------------------------------------------------------------------------------------------------------------------------------------------------------------------------------------------------------------------------------------------------------------------------------------------------------------------------------------------------------------------------------------------------------------------------------------------------------------------------------------------------------------------------------------------------------------------------------------------------------------------------------------------------------------------------------------------------------------------------------------------------------------------------------------------------------------------------------------------------------------------------------------------|
|  | <p>baseline]</p> <p>Total number of healthcare consultations attended for musculoskeletal pain for each group (intervention and control) from baseline to three months post-baseline (between group differences) [Time Frame: Total aggregated healthcare consultations attended (for all participants in each group) between baseline and three months post-baseline]</p> <p>Mean change from baseline in self-reported Musculoskeletal pain illness perceptions measured using the Brief Illness Perception Questionnaire (BIPQ) (within- and between group changes) [Time Frame: BIPQ will be collected at baseline, repeated directly after first exposure to the film, 24-72 hours prior to the initial physiotherapy consultation, 24 hours post-initial physiotherapy consultation and again at three months post-baseline]</p> <p>Mean self-reported global rating of change measured using a global rating of change scale (GRoCs) measured at three time points (analysed for both within- and between group changes) [Time Frame: GRoCs will be collected at three time points; first 24-72 hours prior to the initial physiotherapy consultation, 24 hours post-initial physiotherapy consultation and again at three months post-baseline]</p> <p>Mean change from baseline in self-reported traditional musculoskeletal pain coping strategies and psychological flexibility measured using the Brief Pain Coping Inventory 2 (BPCI-2) (within- and between group changes) [Time Frame: BPCI-2 will be collected at baseline, 24-72 hours prior to the initial physiotherapy consultation, 24 hours post-initial physiotherapy consultation and again at three months post-baseline.]</p> <p>Mean change from baseline in self-reported level of reassurance as to the benign nature of MSKP will be measured using a single numerical rating scale (Reassurance NRS) (within- and between group changes) [Time Frame: Reassurance NRS will be collected at baseline, 24-72 hours prior to the initial physiotherapy consultation, 24 hours post-initial physiotherapy consultation and again at three months post-baseline.]</p> <p>Total days of Sickness absence for each group (intervention and control) from baseline to three months post-baseline (between group difference) [Time Frame: Total aggregated days (for all participants in each group) from baseline to three months post-baseline]</p> <p>Total number of referrals for diagnostic imaging for each group (intervention and control) from baseline to three months post-baseline (between group differences) [Time Frame: Total aggregated referrals (for all participants in each group) made between baseline and three months post-baseline]</p> <p>Change in type and frequency of self-reported analgesic medication use (within and between group changes) [Time Frame: will be collected at baseline, 24-72 hours prior to the initial physiotherapy consultation, 24 hours post-initial physiotherapy consultation and again at three months post-baseline.]</p> <p>Mean change in self-reported levels of physical activity measured using three screening questions developed for the Swedish national board of health and welfare (within- and between group changes) [Time Frame: Physical activity will be collected at baseline, 24-72 hours prior to the initial physiotherapy consultation, 24 hours post-initial physiotherapy consultation and again at three months post-baseline.]</p> <p>Total number of referrals to tertiary/specialist care for musculoskeletal pain for each group (intervention and control) from baseline to three months post-baseline (between group differences) [Time Frame: Total aggregated referrals (for all participants in each group) made between baseline and three months post-baseline]</p> <p>One-off screening at baseline with the Örebro Musculoskeletal pain screening questionnaire [Time Frame: Baseline only]</p> |
|--|--------------------------------------------------------------------------------------------------------------------------------------------------------------------------------------------------------------------------------------------------------------------------------------------------------------------------------------------------------------------------------------------------------------------------------------------------------------------------------------------------------------------------------------------------------------------------------------------------------------------------------------------------------------------------------------------------------------------------------------------------------------------------------------------------------------------------------------------------------------------------------------------------------------------------------------------------------------------------------------------------------------------------------------------------------------------------------------------------------------------------------------------------------------------------------------------------------------------------------------------------------------------------------------------------------------------------------------------------------------------------------------------------------------------------------------------------------------------------------------------------------------------------------------------------------------------------------------------------------------------------------------------------------------------------------------------------------------------------------------------------------------------------------------------------------------------------------------------------------------------------------------------------------------------------------------------------------------------------------------------------------------------------------------------------------------------------------------------------------------------------------------------------------------------------------------------------------------------------------------------------------------------------------------------------------------------------------------------------------------------------------------------------------------------------------------------------------------------------------------------------------------------------------------------------------------------------------------------------------------------------------------------------------------------------------------------------------------------------------------------------------------------------------------------------------------------------------------------------------------------------------------------------------------------------------------------------------------------------------------------------------------------------------------------------------------------------------------------------------------------------------------------------------------------------------------------------------------------------------------------------------------------------------------------------------------------------------------------------------------------------------------------------------------------------------------------------------------------------------------------------------------------------------------------------------------------------------------------------------------------------------------------------------------------------------------------------------------------------------------------------------------------------------------------------------------------------------------------------------------------------------------------------------------------------------------------------------------------------|
